# Supplementary material
Source: HighWire-hosted journal article supplement (https://bmjopen.bmj.com/content/7/12/e018452)
Supplement: inline-supplementary-material-3 [file inline-supplementary-material-3.pdf]

# The Picture Talk Project

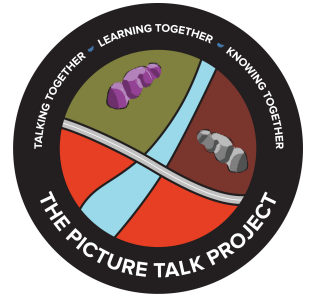

## INTERVIEW QUESTIONS

1. How do you think permission should be granted for research with the Aboriginal communities of the Fitzroy Valley?
2. What do you think about the way research projects approach this process?
3. Does this process respect Aboriginal culture?
4. What do researchers need to know when consulting communities and their leaders to see if they can do a project?
5. How do researchers approach a community?
6. How do they start communication with the community leader?
7. What steps need to be taken to ask permission from a community leader?
8. Is permission from the community leader enough to start a project or does permission need to be sought from the community? If so, how is this done?
9. Who do researchers approach first for the Fitzroy Valley?
10. Are there any organisations that need to be involved?
11. Which leaders do they need to talk to?
12. Do they have to talk to all the leaders for every project?
13. How much information should a project give when talking about a proposed research project?
14. How should this information be delivered?
15. Can you tell me from your experience an example of a research project that worked well with the Fitzroy Valley Communities? What made it a good?
16. Can you tell me from your experience an example of a research project that did not work well with the Fitzroy Valley Communities? What was not so good?
17. If permission is granted for a project, how long does the permission last?
18. Do researchers need to “check in” that the leaders are happy with the project? How often? How do they do this?
19. Do you have any things you think researchers should NOT do?
20. Is there any other information you would like to share?
