# Supplementary material
Source: HighWire-hosted journal article supplement (https://bmjopen.bmj.com/content/7/12/e018452)
Supplement: inline-supplementary-material-4 [file inline-supplementary-material-4.pdf]

# The Picture Talk Project

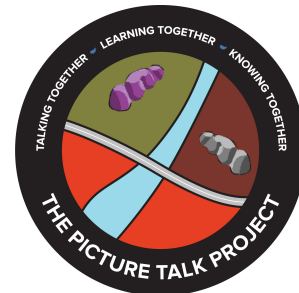

## FOCUS GROUP QUESTIONS

1. What is your understanding of research?
2. Has anyone had any experience with a research project?
3. If someone was to come to ask you to take part in a research project, where is the place you would feel most comfortable to talk about it?
4. *Who would you talk to if you wanted to know more about the project or join in?*
5. Would you prefer to have a local Aboriginal person who has been given knowledge about the project to help explain/discuss it with you rather than an outside person?
6. How much detail about a project would you want before giving consent?
7. What would you think about receiving information about research that is given to you written in English?
8. Is it better to have the information about research provided by talking or writing?
9. Would you prefer to give permission by *saying* it's ok or would you rather *sign* a paper? Or some other way?
10. What do you think about using photographs or pictures?

These photos were used in the Lililwan Project to explain about the Kids health check. (*Hand around the flip chart, also have a copy of one page in hand*)

They have also been made into cartoons on the computer. (*Hand around chart, hold corresponding page to photo example in hand*)

11. How would you explain what is happening in the picture using your own words?
12. I have seen some researchers use stories to help explain their study. What do you think about this?
13. What research projects do you think the Fitzroy Valley needs?
14. Would anybody like to make any further comments, questions or suggestions?
